# Supplementary material for: Dynamics of Actin Cytoskeleton and Their Signaling Pathways during Cellular Wound Repair
Source: MDPI journal article supplement (doi:10.3390/cells11193166), 2022-10-09
Supplement: s1 [file s1]

# Dynamics of actin cytoskeleton and their signaling pathways during cellular wound repair

Shigehiko Yumura, Md. Shahabe Uddin Talukder, Mst. Shaela Pervin, Md. Istiaq Obaidi Tanvir, Takashi Matsumura, Koushiro Fujimoto, Masahito Tanaka, and Go Itoh

**Supplementary Table S1** Descriptions of the examined proteins and their participation for wound repair

| Categories     | Protein Name                           | Description                                                                                 | Accumulation of GFP-protein at wound site | Sources of GFP-constructs | Actin accumulation in null cells or in the presence of inhibitor | Sources of mutants or constructs |
|----------------|----------------------------------------|---------------------------------------------------------------------------------------------|-------------------------------------------|---------------------------|------------------------------------------------------------------|----------------------------------|
| Actin-related  | actin                                  | actin                                                                                       | Yes (GFP-actin, GFP-lifeact)              | *1                        | Aberrant (latrunculin)                                           |                                  |
|                | severin                                | Ca <sup>2+</sup> -dependent F-actin severing protein like gelsolin                          | Yes                                       | *1                        | Normal (null)                                                    | *3                               |
|                | WASP                                   | Wiscott-Aldrich syndrome protein                                                            | Yes                                       | *2                        | Aberrant (wiscostatin or null)                                   | *2                               |
|                | Arp3                                   | actin-related protein 3                                                                     | Yes                                       | *2                        | Aberrant (CK666 or CK869)                                        |                                  |
|                | MyoA                                   | myosin IA heavy chain, Type I myosin                                                        | No                                        | Titus labo                | ND                                                               |                                  |
|                | MyoB                                   | myosin IB heavy chain, Type I myosin                                                        | Yes                                       | Titus labo                | ND                                                               |                                  |
|                | MyoC                                   | myosin IC heavy chain, Type I myosin                                                        | Yes                                       | Titus labo                | ND                                                               |                                  |
|                | filamin                                | actin binding protein C, ABP120                                                             | Yes                                       | *1                        | Normal (null)                                                    | *2                               |
|                | ABP34                                  | Actin-bundling protein, ABPB                                                                | Yes                                       | *1                        | ND                                                               |                                  |
|                | Cap32                                  | Actin-capping protein 32                                                                    | Yes                                       | *1                        | ND                                                               |                                  |
|                | fimbrin                                | calcium-regulated actin bundling protein, p67                                               | Yes                                       | *1                        | ND                                                               |                                  |
|                | α-actinin                              | Actin-bundling protein, ABPA                                                                | Yes                                       | *1                        | Normal (null)                                                    | Noegel labo                      |
|                | coronin                                | Regulate actin depolymerization                                                             | Yes                                       | *3                        | Aberrant (null)                                                  | *3                               |
|                | cofilin                                | Sever actin filaments and bind to actin monomers                                            | Yes                                       | Aizawa labo               | ND                                                               |                                  |
|                | profilins A and B                      | G-actin binding proteins                                                                    | ND                                        |                           | Aberrant (double null)                                           | *3                               |
|                | WASH                                   | Actin nucleation promoting factor activating Arp2/3                                         | ND                                        |                           | Normal (null)                                                    | *2                               |
|                | EfaA1                                  | elongation factor 1 alpha, ABP50                                                            | Disappear (2)                             | *3                        | ND                                                               |                                  |
|                | Myosin II                              | Type II myosin heavy chain                                                                  | Disappear (2)                             | Uyeda labo, *1            | Normal (null)                                                    | Manstein labo, *2                |
|                | MHCKC                                  | myosin heavy chain kinase C                                                                 | Disappear (2)                             | Egelhoff labo             | Normal (null)                                                    | Egelhoff labo                    |
|                | SCAR                                   | Suppressor of cAMP receptor mutation, WAVE                                                  | No                                        | *2                        | ND                                                               |                                  |
|                | vinculin                               | vinculin A                                                                                  | No                                        | *3                        | ND                                                               |                                  |
|                | CARMIL                                 | Capping protein, ARP2/3 and Myosin I Linker                                                 | Yes                                       | *1                        | ND                                                               |                                  |
|                | GmfA                                   | ADF/cofilin-like domain-containing protein                                                  | No                                        | *1                        | ND                                                               |                                  |
|                | Cortextillins A and B                  | actin bundling protein cortextillin A and B                                                 | Disappear (2)                             | *1                        | Normal (double null)                                             | *3                               |
|                | paxillin                               | paxillin B                                                                                  | No                                        | *3                        | ND                                                               |                                  |
|                | formin A                               | mDia1-like formin A                                                                         | No                                        | *3                        | ND                                                               |                                  |
|                | formin family                          | mDia1-like formin family                                                                    | ND                                        |                           | Aberrant (SMFH3)                                                 |                                  |
|                | DwwA                                   | WW domain-containing protein, interacting with the actin cytoskeleton by binding calmodulin | No                                        | *3                        | ND                                                               |                                  |
|                | CAP                                    | cyclase associated protein, linking with the actin cytoskeleton                             | No                                        | *3                        | ND                                                               |                                  |
| Signal-related | GAPA                                   | RasGTPase-activating protein                                                                | Disappear (2)                             | *3                        | ND                                                               |                                  |
|                | PI3 kinases (pikA/pikB/pikC/pikF/pikG) | phosphatidylinositol-4,5-diphosphate 3-kinase 1                                             | ND                                        |                           | Normal (quintuple null)                                          | *2                               |

|                     |                        |                                                                                       |               |                    |                         |                    |
|---------------------|------------------------|---------------------------------------------------------------------------------------|---------------|--------------------|-------------------------|--------------------|
|                     | PH domain of PI3Kinase | Marker of phosphatidylinositol (3,4,5)-trisphosphate                                  | No            | *2                 | ND                      |                    |
|                     | PakA                   | P21-Activated protein Kinase                                                          | Disappear (2) |                    | Normal (null)           | Iijima labo        |
|                     | IplA                   | inositol 1,4,5-trisphosphate receptor-like protein A                                  | ND            |                    | Aberrant (null)         | *2                 |
|                     | Htt                    | Huntington's disease protein homolog                                                  | ND            |                    | Normal (null)           | *2                 |
|                     | RacA                   | Rho GTPase racA                                                                       | No            | *1                 | ND                      |                    |
|                     | RacE                   | Rho GTPase racE                                                                       | ND            |                    | Normal (null)           | *2                 |
|                     | Rac family             | Rho GTPase rac family                                                                 | ND            |                    | Aberrant (EHT1864)      |                    |
|                     | PKB                    | AKT/PKB protein kinase PkbA                                                           | ND            |                    | Normal (null)           | *2                 |
|                     | AcA                    | adenylate cyclase A                                                                   | ND            |                    | Normal (null)           | *2                 |
|                     | calmodulin             | calmodulin                                                                            | Yes           | *1                 | Aberrant (W7)           |                    |
|                     | Phg2                   | protein serine/threonine kinase Phg2                                                  | ND            |                    | Normal (null)           | *2                 |
|                     | PTEN                   | Phosphatase and tensin homolog                                                        | Disappear (2) | Iijima labo        | Aberrant (null)         | Iijima labo        |
|                     | SpkA                   | Stress-activated Protein Kinase-1                                                     | No            | *2                 | ND                      |                    |
|                     | PLC                    | phosphoinositide-specific phospholipase C                                             | ND            |                    | Aberrant (U73122)       |                    |
|                     | PLA2                   | phospholipase A2                                                                      | ND            |                    | Aberrant (BPB or null)  |                    |
|                     | TORC2                  | TOR complex protein kinase                                                            | ND            |                    | Aberrant (Torin 1)      |                    |
|                     | PKC                    | protein kinase C, PkcA                                                                | ND            |                    | Normal (BIM I )         |                    |
|                     | ElmoE                  | engulfment and cell motility ELM family protein E                                     | ND            |                    | Aberrant (null)         | Jin labo           |
|                     | GcA and SgcA           | membrane bound guanylyl cyclase A / soluble guanylyl cyclase A)                       | ND            |                    | Normal (double null)    | *2                 |
|                     | GbpC and GbpD          | cGMP-binding protein C / cGMP-binding protein D                                       | ND            |                    | Normal (double null)    | *2                 |
| Membrane-related    | TorA                   | a novel protein with predicted coiled-coil motif near its carboxy terminus (Tortoise) | ND            |                    | Aberrant (null)         | *2                 |
|                     | RasC and RasG          | Ras GTPase RasC / Ras GTPase RasG                                                     | ND            |                    | Normal (double null)    | *2                 |
|                     | DlpA                   | dynammin-like protein A                                                               | Disappear (2) | *1                 | Aberrant (null)         | *2                 |
|                     | DlpB                   | dynammin-like protein B                                                               | ND            |                    | Normal (null)           | *2                 |
|                     | DymA                   | dynammin A                                                                            | No            | *1                 | ND                      |                    |
|                     | LvsA                   | large volume sphere mutant A                                                          | ND            |                    | Aberrant (null)         | *2                 |
|                     | clathrin               | Clathrin heavy chain                                                                  | Disappear (2) | O'Halloran labo,*1 | Normal (null)           | O'Halloran labo,*1 |
|                     | Tsg101                 | tumor susceptibility gene 101 protein, ESCRT component                                | ND            |                    | Normal (null)           | *1                 |
|                     | PefA                   | penta EF hand calcium binding protein                                                 | Yes (1)       | *1                 | ND                      |                    |
|                     | Vps4                   | AAA ATPase domain-containing protein, ESCRT component                                 | Yes (1)       | *1                 | ND                      |                    |
|                     | annexinC1              | Ca- and phospholipid-binding protein                                                  | Yes (3)       | *1                 | Aberrant (null)         | *1                 |
|                     | annexinC2              | Ca- and phospholipid-binding protein                                                  | No (3)        | *1                 | ND                      | *1                 |
|                     | golgesin               | Golgi and vesicle associated protein                                                  | Disappear (2) | *2                 | ND                      |                    |
|                     | calreticulin           | Ca-binding protein in the endoplasmic reticulum                                       | No (1)        | *2                 | ND                      |                    |
|                     | LmpA                   | lysosomal-associated membrane glycoprotein                                            | No (1)        | *2                 | ND                      |                    |
| Microtubule-related | cAR1                   | cAMP receptor 1 in the cell membrane                                                  | No (1)        | *3                 | ND                      |                    |
|                     | tubulin                | alpha-tubulin                                                                         | No (1)        | *1                 | Normal (thiabendazole ) |                    |
|                     | Kif12                  | kinesin family member 12                                                              | ND            |                    | Normal (null)           | *2                 |

Yes: accumulated at the wound site, No: Not accumulated, ND: Not determined

\*1: Yumura laboratory

\*2: DictyBase

\*3: NBRP Nenkin

(1): Data from our previous report, Talukder, M.S.U. et al., 2020.

(2): Data from our previous report, Tanvir, M.I.O. et al., 2021.

(3): Data from our previous report, Pervin, M.S. et al., 2018.
